# Supplementary material for: Efficient Ce3+ → Tb3+ energy transfer pairs with thermal stability and internal quantum efficiency close to unity
Source: Royal Society of Chemistry journal article supplement (doi:10.1039/d2qi01967a), 2022-01-01
Supplement: d2qi01967a1.pdf [file d2qi01967a1.pdf]

## Supporting Information

### **Efficient Ce<sup>3+</sup>→Tb<sup>3+</sup> energy transfer pairs toward thermal-stability and internal quantum efficiency close to unity**

Quwei Ni,<sup>a</sup> Jiansheng Huo,<sup>\*,b</sup> Jiachun Liu<sup>a</sup>, Haojun Yan<sup>a</sup>, Qijian Zhu,<sup>a</sup> Jieying Li,<sup>a</sup> Chenggang Long<sup>c</sup> and Qianming Wang,<sup>\*,a</sup>

*a* Key Laboratory of Theoretical Chemistry of Environment, Ministry of Education, School of Chemistry, South China Normal University, Guangzhou 510006, P.R. China.

*b* Key Laboratory of Separation and Comprehensive Utilization of Rare Metals, Guangdong Province Key Laboratory of Rare Earth Development and Application, Institute of Resources Utilization and Rare Earth Development, Guangzhou 510651, P.R. China.

*c* Ruide Technologies (Foshan) Inc. Foshan, Guangdong, 528311, China

#### *Corresponding Authors*

\* *E-mail: [jshuoscnu@126.com](mailto:jshuoscnu@126.com) (J. H.).*

\* *E-mail: [qmwang@scnu.edu.cn](mailto:qmwang@scnu.edu.cn) (Q. W.).*

**Figure S1.** X-ray diffraction patterns of typically synthesized CLSO: $x\%Ce^{3+}$  ( $x = 0.01, 0.03, 0.05, 0.08, 0.10$  and  $0.15$ ) samples together with the standard data (ICSD No.59293) for comparison.

**Figure S2.** The ratio of the integral emission energy of  $Ce^{3+}$  and  $Tb^{3+}$  in the overall emission energy.

**Figure S3.** The integrated luminescence intensity and PL spectra (a), and XRD patterns (b) evolution of CLSO: $8\%Ce^{3+}, 60\%Tb^{3+}$  exposed to ambient atmosphere for different times.

**Table S1.** Rietveld refinement, crystallographic and structure parameters of the representative sample of CLSO: $8\%Ce^{3+}, 60\%Tb^{3+}$ .

**Table S2.** Comparison of luminescence properties ( $\lambda_{ex}$  (nm), IQE, EQE, thermal stability ( $I_{423K}/I_{298K}$ ), LE and color gamut) for the CLSO: $8\%Ce^{3+}, 60\%Tb^{3+}$  and several other reported green-emitting phosphors

**Table S3** RGB CIE chromaticity coordinates of the fabricated pc-WLED device and the NTSC standard.

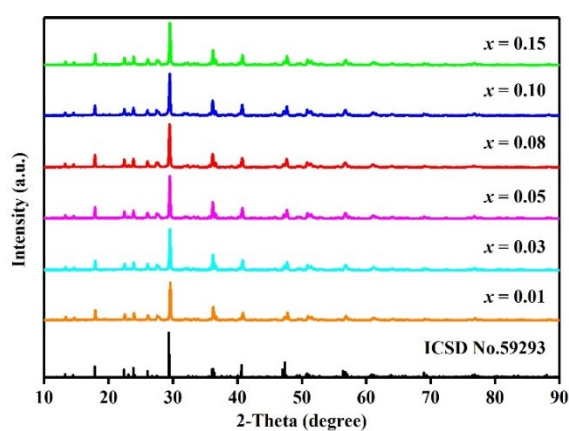

**Figure S1**

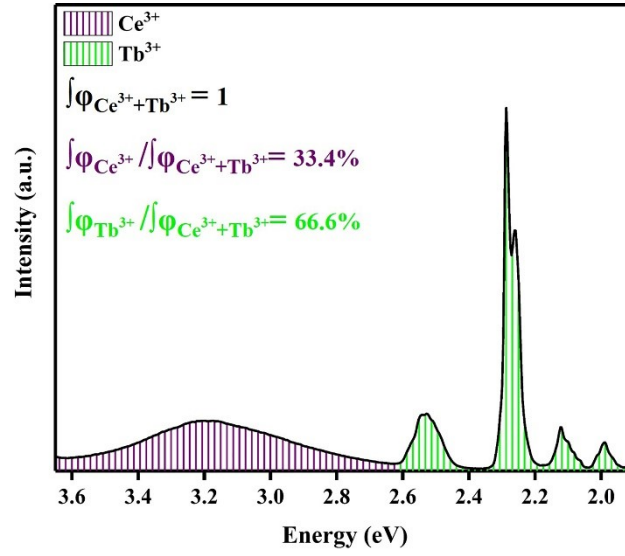

Figure S2

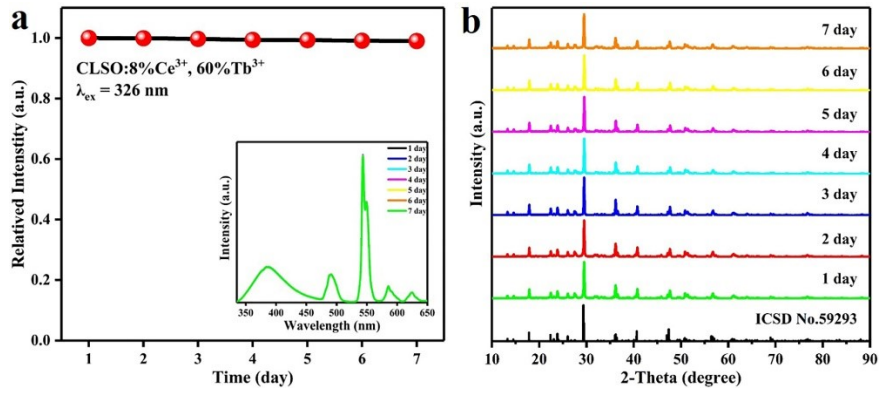

Figure S3

Table S1

| formula                     | $\text{Ca}_3\text{Lu}_2\text{Si}_6\text{O}_{18}:8\%\text{Ce}^{3+}, 60\%\text{Tb}^{3+}$                                         |
|-----------------------------|--------------------------------------------------------------------------------------------------------------------------------|
| crystal system              | monoclinic                                                                                                                     |
| space group                 | $C2/c$                                                                                                                         |
| $\alpha/\beta/\gamma$ (deg) | $\alpha = \beta = \gamma = 90$                                                                                                 |
| cell parameters             | $a = 13.3135(9) \text{ \AA}, b = 7.6986(9) \text{ \AA}, c = 14.7229(6) \text{ \AA},$<br>$V = 1509.062(2) \text{ \AA}^3, Z = 4$ |
| Reliability factors         | $R_{wp} = 9.52\%, R_p = 5.73\%, x^2 = 4.22$                                                                                    |

Table S2

| Samples                                                                                                         | $\lambda_{\text{ex}}$<br>(nm) | IQE   | EQE   | $I_{423\text{K}}/I_{298\text{K}}$<br>(%) | LE<br>(lm/W) | Color            |      |
|-----------------------------------------------------------------------------------------------------------------|-------------------------------|-------|-------|------------------------------------------|--------------|------------------|------|
|                                                                                                                 |                               |       |       |                                          |              | Gamut<br>(%NTSC) | Ref. |
| $\text{Ca}_2\text{GdHf}_2\text{Al}_3\text{O}_{12}:\text{Ce}^{3+}, \text{Tb}^{3+}$                               | 408                           | 82.7  | 60.6  | 48                                       | 27.4         |                  | 1    |
| $\text{La}_3\text{Si}_8\text{N}_{11}\text{O}_4:\text{Ce}^{3+}, \text{Tb}^{3+}$                                  | 360                           | 76.3  | 46.7  | 90                                       | 4.4          |                  | 2    |
| $\text{Sr}_4\text{Al}_{14}\text{O}_{25}:\text{Ce}^{3+}, \text{Tb}^{3+}$                                         | 348                           | 47.04 |       | 82.21                                    | 21.87        | 85.34            | 3    |
| $\text{Ca}_3\text{Gd}_2\text{Si}_6\text{O}_{18}:\text{Ce}^{3+}, \text{Tb}^{3+}$                                 | 325                           | 95.1  | 80.5  | 92                                       | 15.73        |                  | 4    |
| $\text{Ca}_2\text{YHf}_2\text{Al}_3\text{O}_{12}:\text{Ce}^{3+}, \text{Tb}^{3+}$                                | 408                           | 78.5  | 56    | 43.3                                     | 29.25        |                  | 5    |
| $\text{Ba}_2\text{Y}_3(\text{SiO}_4)_3\text{F}:\text{Ce}^{3+}, \text{Tb}^{3+}$                                  | 355                           | 83.12 |       | 82                                       | 24.4         |                  | 6    |
| $\text{La}_2\text{Si}_2\text{O}_7:\text{Ce}^{3+}, \text{Tb}^{3+}$                                               | 332                           | 95.6  |       | 89                                       |              |                  | 7    |
| $\text{Sr}_3\text{Lu}_2(\text{BO}_3)_4:\text{Ce}^{3+}, \text{Tb}^{3+}$                                          | 340                           | 77.5  | 34.8  | 70                                       |              |                  | 8    |
| $\text{Ca}_2\text{TbZr}_2\text{Al}_3\text{O}_{12}:\text{Ce}^{3+}$                                               | 410                           | 60    |       | 55                                       | 15.71        | 61               | 9    |
| $\text{Ca}_2\text{LuHf}_2\text{Al}_3\text{O}_{12}:\text{Ce}^{3+}, \text{Tb}^{3+}$                               | 408                           | 77.1  | 55.8  | 62                                       | 29.35        |                  | 10   |
| $\text{SrB}_2\text{O}_4:\text{Ce}^{3+}, \text{Tb}^{3+}$                                                         | 319                           | 54.7  |       | 59.3                                     |              |                  | 11   |
| $\text{Ba}_2\text{Lu}_5\text{B}_5\text{O}_{17}:\text{Ce}^{3+}, \text{Tb}^{3+}$                                  | 348                           | 86    |       | 90                                       | 18.81        |                  | 12   |
| $\text{Ba}_3\text{GdNa}(\text{PO}_4)_3\text{F}:\text{Ce}^{3+}, \text{Tb}^{3+}$                                  | 273                           | 65.5  |       | 94                                       |              |                  | 13   |
| $[\text{Mg}_{1.25}\text{Si}_{1.25}\text{Al}_{2.5}]\text{O}_3\text{N}_3:\text{Ce}^{3+}, \text{Tb}^{3+}$          | 335                           | 41.14 |       | 65                                       | 5.279        |                  | 14   |
| $\text{Ca}_2\text{ZrSi}_4\text{O}_{12}:\text{Ce}^{3+}, \text{Tb}^{3+}$                                          | 322                           | 59.2  | 32.7  | 72.5                                     |              |                  | 15   |
| $\text{Ca}_2\text{LuZr}_2(\text{AlO}_4)_3:\text{Ce}^{3+}, \text{Tb}^{3+}$                                       | 408                           | 69    |       | 48                                       | 25           |                  | 16   |
| $\text{Na}_2\text{Ca}_3\text{Si}_2\text{O}_8:\text{Ce}^{3+}, \text{Tb}^{3+}$                                    | 330                           | 85.5  |       | 86                                       | 6            |                  | 17   |
| $\text{LaPO}_4:\text{Ce}^{3+}, \text{Tb}^{3+}$                                                                  | 290                           | 96    | 86    |                                          |              |                  | 18   |
| $\text{Na}_{1.8}\text{Mg}_{0.9}\text{Si}_{1.1}\text{O}_4:\text{Ce}^{3+}, \text{Tb}^{3+}$                        | 340                           | 82    |       | 49.9                                     |              |                  | 19   |
| $\text{Sr}_5\text{B}_3\text{O}_9\text{F}:\text{Ce}^{3+}, \text{Tb}^{3+}$                                        | 365                           | 57    |       | 32                                       |              |                  | 20   |
| $\text{La}_8\text{Ba}_2(\text{Si}_4\text{P}_2\text{O}_{22}\text{N}_2)\text{O}_2:\text{Ce}^{3+}, \text{Tb}^{3+}$ | 290                           | 89    |       | 91.2                                     |              |                  | 21   |
| $\text{Ca}_2\text{LaHf}_2\text{Al}_3\text{O}_{12}:\text{Ce}^{3+}, \text{Tb}^{3+}$                               | 408                           | 80    | 59.2  | 27                                       | 17.56        |                  | 22   |
| $\text{Sr}_2\text{MgB}_2\text{O}_6:\text{Ce}^{3+}, \text{Tb}^{3+}$                                              | 323                           | 66.39 | 48.92 | 75.3                                     | 6.19         | 87               | 23   |
| $\text{Y}_5\text{Si}_3\text{O}_{12}\text{N}:\text{Ce}^{3+}, \text{Tb}^{3+}$                                     | 358                           | 85    |       | 80                                       |              |                  | 24   |
| $\text{CaAl}_4\text{O}_7:\text{Ce}^{3+}, \text{Tb}^{3+}$                                                        | 350                           | 92.55 | 71.02 | 68.5                                     |              |                  | 25   |

|                                                                                                     |     |      |      |      |       |      |           |
|-----------------------------------------------------------------------------------------------------|-----|------|------|------|-------|------|-----------|
| Ba <sub>3</sub> Lu <sub>2</sub> B <sub>6</sub> O <sub>15</sub> :Ce <sup>3+</sup> , Tb <sup>3+</sup> | 373 | 51   |      | 54   |       |      | 26        |
| [Sr,BaSiO <sub>4</sub> ]:Eu <sup>2+</sup>                                                           | 430 | 78   |      | >50  | 18.45 |      | 27        |
| β-Sialon:Eu <sup>2+</sup>                                                                           | 450 | 96.5 | 71.3 |      | 136   | 96   | 28        |
| CLSO:Ce <sup>3+</sup> , Tb <sup>3+</sup>                                                            | 326 | 99.7 | 76.6 | 86.8 | 31.4  | 90.2 | This work |

Table S3

| Name                | R                | G                | B                |
|---------------------|------------------|------------------|------------------|
| NTSC                | (0.67, 0.33)     | (0.21, 0.71)     | (0.14, 0.08)     |
| Fabricated pc-WLEDs | (0.6892, 0.3108) | (0.2936, 0.6655) | (0.1481, 0.0665) |

#### Reference

- 1 X. Huang, J. Liang, S. Rtimi, B. Devakumar and Z. Zhang, Ultra-high color rendering warm-white light-emitting diodes based on an efficient green-emitting garnet phosphor for solid-state lighting, *Chem. Eng. J.*, 2021, **405**, 126950.
- 2 H.-B. Xu, W.-D. Zhuang, R.-H. Liu, Y.-H. Liu, T.-L. Zhou, Y. Cho, W. Gao, C.-P. Yan, N. Hirotsuki and R.-J. Xie, Significantly enhanced photoluminescence and thermal stability of La<sub>3</sub>Si<sub>8</sub>N<sub>11</sub>O<sub>4</sub>:Ce<sup>3+</sup>,Tb<sup>3+</sup> via the Ce<sup>3+</sup>→Tb<sup>3+</sup> energy transfer: a blue-green phosphor for ultraviolet LEDs, *RSC Adv.*, 2018, **8**, 35271-35279.
- 3 H. Li, Y. Liang, S. Liu, W. Zhang, Y. Bi, Y. Gong, Y. Chen and W. Lei, Highly efficient green-emitting phosphor Sr<sub>4</sub>Al<sub>14</sub>O<sub>25</sub>:Ce,Tb with low thermal quenching and wide color gamut upon UV-light excitation for backlighting display applications, *J. Mater. Chem. C*, 2021, **9**, 2569-2581.
- 4 D. Wu, Y. Xiao, L. Zhang, X. Dong, S. Zhao, W. Zhou, Q. Lu and J. Zhang, Highly efficient and thermally stable luminescence of Ca<sub>3</sub>Gd<sub>2</sub>Si<sub>6</sub>O<sub>18</sub>:Ce<sup>3+</sup>,Tb<sup>3+</sup> phosphors based on efficient energy transfer, *J. Mater. Chem. C*, 2020, **8**, 17176-17184.
- 5 S. Wang, B. Devakumar, Q. Sun, J. Liang, L. Sun and X. Huang, Highly efficient near-UV-excitable Ca<sub>2</sub>YHf<sub>2</sub>Al<sub>3</sub>O<sub>12</sub>:Ce<sup>3+</sup>,Tb<sup>3+</sup> green-emitting garnet phosphors with potential application in high color rendering warm-white LEDs, *J. Mater. Chem. C*, 2020, **8**, 4408-4420.

- 6 D. Wu, W. Xiao, L. Zhang, X. Zhang, Z. Hao, G.-H. Pan, Y. Luo and J. Zhang, Simultaneously tuning the emission color and improving thermal stability via energy transfer in apatite-type phosphors, *J. Mater. Chem. C*, 2017, **5**, 11910-11919.
- 7 W. Ma, J. Zhang, X. Zhang, X. Zhang, Y. Liu, S. Liao and S. Lian, Highly efficient and thermal stable  $\text{La}_2\text{Si}_2\text{O}_7:\text{Ce}^{3+}, \text{Tb}^{3+}, \text{Eu}^{3+}$  phosphors: emission color tuning through terbium bridge, *J. Alloys Compd.*, 2019, **785**, 53-61.
- 8 Y. Zhang, X. Zhang, H. Zhang, Z.-C. Wu, Y. Liu, L. Ma, X. Wang, W.-R. Liu and B. Lei, Enhanced absorption of  $\text{Sr}_3\text{Lu}_2(\text{BO}_3)_4:\text{Ce}^{3+}, \text{Tb}^{3+}$  phosphor with energy transfer for UV-pumped white LEDs, *J. Alloys Compd.*, 2019, **789**, 215-220.
- 9 T. Zhang, N. Li, Z. Yu, P. Du, B. Tian, Z. Li, Y. Tian, Violet-light-excitable super-narrow band green emitting phosphor for high-quality white LEDs, *J. Lumin.*, 2020, **225**, 117318.
- 10 N. Ma, W. Li, B. Devakumar, Z. Zhang and X. Huang, Utilizing energy transfer strategy to produce efficient green luminescence in  $\text{Ca}_2\text{LuHf}_2\text{Al}_3\text{O}_{12}:\text{Ce}^{3+}, \text{Tb}^{3+}$  garnet phosphors for high-quality near-UV-pumped warm-white LEDs, *J. Colloid Interface Sci.*, 2021, **601**, 365-377.
- 11 S. Sun, L. Wu, H. Yi, L. Wu, J. Ji, C. Zhang, Y. Zhang, Y. Kong and J. Xu, Energy transfer between  $\text{Ce}^{3+}$  and  $\text{Tb}^{3+}$  and the enhanced luminescence of a green phosphor  $\text{SrB}_2\text{O}_4:\text{Ce}^{3+}, \text{Tb}^{3+}, \text{Na}^+$ , *Opt. Mater. Express*, 2016, **6**, 1172-1185.
- 12 Y. Xiao, Z. Hao, L. Zhang, X. Zhang, G.-H. Pan, H. Wu, H. Wu, Y. Luo and J. Zhang, An efficient green phosphor of  $\text{Ce}^{3+}$  and  $\text{Tb}^{3+}$ -codoped  $\text{Ba}_2\text{Lu}_3\text{B}_5\text{O}_{17}$  and a model for elucidating the high thermal stability of the green emission, *J. Mater. Chem. C*, 2018, **6**, 5984-5991.
- 13 Z. Yang, Y. Yu, G. Zhang, C. Ji, H. Bu, D. Xu and J. Sun, Luminescence properties and energy transfer of co-doped  $\text{Ba}_3\text{GdNa}(\text{PO}_4)_3\text{F}:\text{Ce}^{3+}, \text{Tb}^{3+}$  green-emitting phosphors, *J. Mater. Sci.: Mater. Electron.*, 2018, **29**, 7203-7212.
- 14 J. Li, X. Zhou, J. Ding, X. Zhou and Y. Wang, Mechanism analysis of a narrow-band ultra-bright green phosphor with its prospect in white light-emitting diodes and field emission displays, *J. Mater. Chem. C*, 2019, **7**, 2257-2266.
- 15 X. Zhang, B. Liu, S. Cao, L. Dong, J. Wang and L. Liu, Multisite-occupation properties, spectral characteristics and energy-transfer behaviors of  $\text{Ca}_2\text{ZrSi}_4\text{O}_{12}:\text{Ce}^{3+}, \text{Tb}^{3+}$  phosphor for NUV-based LEDs, *Opt. Mater.*, 2022, **124**, 111986.
- 16 L. Sun, J. Liang, S. Wang, Q. Sun, B. Devakumar and X. Huang, Bright cyan-to-green color-tunable

- emissions from Ce<sup>3+</sup>/Tb<sup>3+</sup> co-activated garnet phosphors for high-color-quality solid-state lighting, *Mater. Today Energy*, 2020, **17**, 100487.
- 17 W. Lü, H. Xu, J. Huo, B. Shao, Y. Feng, S. Zhao and H. You, Tunable white light of a Ce<sup>3+</sup>,Tb<sup>3+</sup>,Mn<sup>2+</sup> triply doped Na<sub>2</sub>Ca<sub>3</sub>Si<sub>2</sub>O<sub>8</sub> phosphor for high colour-rendering white LED applications: tunable luminescence and energy transfer, *Dalton Trans.*, 2017, **46**, 9272-9279.
  - 18 R. Iwasaki and K. Kajihara, Negligible concentration quenching in photoluminescent nanocrystals with high photoactive rare-earth concentrations: silica-(Tb,Ce)PO<sub>4</sub> transparent glass-ceramic green phosphors, *J. Mater. Chem. C*, 2021, **9**, 2701-2705.
  19. H. Zhou, H. Zhang, X. Ye, X. Tong, J. Han and X. Zhang, Near-UV excited green-emission enhancement by efficient energy transfer in Na<sub>1.8</sub>Mg<sub>0.9</sub>Si<sub>1.1</sub>O<sub>4</sub>:Ce<sup>3+</sup>,Tb<sup>3+</sup> phosphor for solid-state lighting applications. *Opt. Laser Technol.*, 2022, **150**, 107950.
  20. S. Yang and S. Park, Promising Green Sr<sub>5</sub>B<sub>3</sub>O<sub>9</sub>F: Ce<sup>3+</sup>/ Tb<sup>3+</sup>/Na<sup>+</sup> phosphors for NUV-executable LED applications, *J. Alloys Compd.*, 2020, **834**, 155094.
  21. L. Dong, L. Zhang, Y. Jia, B. Shao, W. Lü, S. Zhao and H. You, Synthesis, Luminescence and application of novel europium, cerium and terbium-doped apatite phosphors, *CrystEngComm*, 2019, **21**, 6226-6237.
  - 22 N. Ma, W. Li, B. Devakumar, X. Huang and A. F. Lee, An energy transfer strategy for highly luminescent green-emitting Ce<sup>3+</sup>/Tb<sup>3+</sup> codoped Ca<sub>2</sub>LaHf<sub>2</sub>Al<sub>3</sub>O<sub>12</sub> garnet phosphors in white light-emitting diodes, *Mater. Today Chem.*, 2022, **24**, 100773.
  - 23 Q. Dong, J. Yang, J. Cui, F. Xu, F. Yang, J. Peng, F. Du, X. Ye and S. Yang, A narrow-band ultra-bright green phosphor for LED-based applications, *Dalton Trans.*, 2020, **49**, 1935-1946.
  - 24 S. A. Khan, N. Z. Khan, W. W. Ji, L. Ali, H. Abadikhah, L. Hao, X. Xu, S. Agathopoulos, Q. Khan and L. Zhu, Luminescence properties and energy transfer in Ce<sup>3+</sup>/Tb<sup>3+</sup> co-doped Y<sub>5</sub>Si<sub>3</sub>O<sub>12</sub>N oxynitride phosphors, *Dyes Pigm.*, 2019, **160**, 675-682.
  - 25 Y. Li, Y. Yin, T. Wang, J. Wu, J. Zhang, S. Yu, M. Zhang, L. Zhao and W. Wang, Ultra-bright green-emitting phosphors with an internal quantum efficiency of over 90% for high-quality WLEDs, *Dalton Trans.*, 2021, **50**, 4159-4166.
  - 26 X. Huang, H. Guo, L. Sun, T. Sakthivel and Y. Wu, A high-efficiency, broadband-excited cyan-emitting Ba<sub>3</sub>Lu<sub>2</sub>B<sub>6</sub>O<sub>15</sub>:Ce<sup>3+</sup>,Tb<sup>3+</sup> phosphor for near-UV-pumped white light-emitting diodes, *J. Alloys Compd.*, 2019, **787**, 865-871.



- 27 X. Zhang, X. Tang, J. Zhang, M. Gong, An efficient and stable green phosphor SrBaSiO<sub>4</sub>:Eu<sup>2+</sup> for light-emitting diodes, *J. Lumin.*, 2010, **130**, 2288–2292.
- 28 S. Li, L. Wang, D. Tang, Y. Cho, X. Liu, X. Zhou, L. Lu, L. Zhang, T. Takeda, N. Hirosaki and R.-J. Xie, Achieving high quantum efficiency narrow-band β-sialon:Eu<sup>2+</sup> phosphors for high-brightness LCD backlights by reducing the Eu<sup>3+</sup> luminescence killer, *Chem. Mater.*, 2018, **30**, 494-505.
